# Supplementary material
Source: MDPI journal article supplement (https://www.mdpi.com/2075-163X/11/2/223)
Supplement: s1 [file s1]

Supplementary

# The Late Triassic Molasse Deposits in Central Jilin Province, NE China: Constraints on the Paleo-Asian Ocean Closure

Zuozhen Han <sup>1,2</sup>, Jingjing Li <sup>1</sup>, Chenlin Zhu <sup>1</sup>, Wenjian Zhong <sup>1</sup> and Zhigang Song <sup>1,3,\*</sup>

<sup>1</sup> College of Earth Science and Engineering, Key Laboratory of Depositional Mineralization & Sedimentary Mineral of Shandong Province, Shandong University of Science and Technology, Qingdao 266590, China; hanzuozhen@sdust.edu.cn (Z.H.); skdljj@sdust.edu.cn (J.L.); chenlinfongann@foxmail.com (C.Z.); zwjlangya@sdust.edu.cn (W.Z.)

<sup>2</sup> Laboratory for Marine Mineral Resources, Qingdao National Laboratory for Marine Science and Technology, Qingdao 266071, China

<sup>3</sup> Research Center of Continental Dynamics, Shandong University of Science and Technology, Qingdao 266590, China

\* Correspondence: zgsong@sdust.edu.cn

## Analytical techniques

### 1. Zircon U–Pb Dating and In-Situ Hf Isotope Analysis

Zircons were separated using a Frantz magnetic separator and heavy liquids at the Hebei Regional Geological Survey, China. Cathodoluminescence (CL) images were obtained using JEOL JXA-8900RL scanning electron microscope at the State Key Laboratory of Continental Dynamics, Northwest University, Xi'an, China. Samples were analyzed for geochronology on an Agilent 7500a ICP-MS equipped with a 193 nm laser ablation system GeoLas 2005, housed at the State Key Laboratory of Continental Dynamics, Northwest University, Xi'an, China. The instrument parameter and detail procedures were described by Yuan et al. (2004) [1]. The spot diameter and denudation depth are 32 µm and 20 to 40 µm, respectively. The 91500 zircon standard was used as an external standard for age calibrations. Furthermore, a standard silicate glass NIST SRM610 and a zircon GJ-1 are the standards as optimizing the analyses. Isotopic ratios and element contents were calculated by using the GLITTER 4.0 [2]. The age calculation and Concordia plots were made using Isoplot (Ver. 3.0) [3]. Concordance was calculated as  $(^{206}\text{Pb}/^{238}\text{U}/^{207}\text{Pb}/^{235}\text{U}) \times 100$  with concordance defined between 90% and 110%.

In-situ zircon Lu–Hf isotopic analysis was carried out on the similar internal domains of close to the original pit used for U–Pb isotopic analyses, using a Nu Plasma II MC-ICP-MS at the State Key Laboratory of Continental Dynamics, Northwest University, Xi'an, China. An ArF excimer laser ablation system of ASI RESOLUTION M-50 (193 nm) was used with a spot size of 44 µm. The Hf isotopic analysis was carried out at a beam density of 6 J/cm<sup>2</sup>, with a repetition rate of 5 Hz. The standard zircons 91500 and Mudtank were used as external standards and were analyzed twice before and after every 8 analyses. The detailed procedures are described by Yuan et al. (2008) [4].

### 2. Whole-Rock Elemental Analysis

The major and trace element concentrations of the whole-rock samples were determined at the Supervision and Inspection Center of Mineral Resources, the Ministry of Land and Resources of

Jinan, China. The concentrations of  $\text{Al}_2\text{O}_3$  and  $\text{SiO}_2$  were analyzed using the xylene orange method and the gelatin coagulation gravimetric method, respectively. The other major oxides and some trace elements, (Cr, V, Sr, and Ba) were determined by IRIS-Intrepid ICP atomic emission spectrometer (AES) using the standard analytical protocol of GB/T14506-2010 for the oxides. Detailed analytical procedures are similar to those described by Rudnick et al. (2004) [5]. Analytical uncertainties range from 1% to 3%. The other trace element concentrations were determined using an X-Series 2 ICP-MS, and the analytical procedures are similar to those described by Song et al. (2018) [6]. An internal standard solution containing the single element Rh was used to monitor signal drift during counting. The analytical precision for major elements is better than 1% and for trace elements is generally better than 5%.

### 3. Whole-Rock Sr-Nd Isotope Analysis

Rb-Sr and Sm-Nd isotopic analyses were performed on a Micromass Isoprobe multi-collector ICPMS (MC-ICP-MS) in static mode at the Institute of Geochemistry, Chinese Academy of Science, Guangzhou, China. The analytical procedures followed those of Li et al. (2004) [7]. During the process of test, the standards NBS 987 and Jndi-1 yielded  $^{87}\text{Sr}/^{86}\text{Sr}$  ratios of  $0.710234 \pm 0.000010$  ( $2\sigma$ ,  $n = 2$ ) and  $^{143}\text{Nd}/^{144}\text{Nd}$  ratios of  $0.512094 \pm 0.000007$  ( $2\sigma$ ,  $n = 2$ ).

## References

1. Yuan, H.L.; Gao, S.; Liu, X.M.; Li, H.M.; Günther, D.; Wu, F.Z. Accurate U-Pb age and trace element determinations of zircon by laser ablation inductively coupled plasma mass spectrometry. *Geostand. Geoanal. Res.* **2004**, *28*, 353–370.
2. Van Acherbergh E.; Ryan, C.G.; Jackson, S.E.; Griffin, W.L. Data reduction software for LA-ICP-MS. In *Laser-ablation-ICP-MS Spectrometry in the Earth Sciences: Principles and Applications*, Sylvester, P.J., Eds.; Mineralogical Association of Canada, MAC Short Course Series: Ottawa, Canada, 2001; 29, pp. 239–243.
3. Ludwig, K.R. User's manual for Isoplot 3.00: A geochronological toolkit for Microsoft Excel. Berkeley Geochronology Center: Berkeley, CA, USA, 2003, 4, 1–70.
4. Yuan, H.L.; Gao, S.; Dai, M.N.; Zong, C.L.; Günther, D.; Fontaine, G.H.; Liu, X.M.; Diwu, C.R. Simultaneous determinations of U-Pb age, Hf isotopes and trace element compositions of zircon by excimer laser-ablation quadrupole and multiple-collector ICP-MS. *Chem. Geol.* **2008**, *247*, 100–118.
5. Rudnick, R.L.; Gao, S.; Ling, W.L.; Liu, Y.S.; McDonough, W.F. Petrology and geochemistry of spinel peridotite xenoliths from Hannuoba and Qixia, North China craton. *Lithos* **2004**, *7*, 609–637.
6. Song, Z.G.; Han, Z.Z.; Gao, L.H.; Geng, H.Y.; Li, X.P.; Meng, F.X.; Han, M.; Zhong, W.J.; Li, J.J.; Du, Q.X.; et al. Permo-Triassic evolution of the southern margin of the Central Asian Orogenic Belt revisited: Insights from Late Permian igneous suite in the Daheishan Horst, NE China. *Gondwana Res.* **2018**, *56*, 23–50.
7. Li, X.H.; Liu, D.Y.; Sun, M.; Li, W.X.; Liang, X.R.; Liu, Y. Precise Sm-Nd and U-Pb isotopic dating of the super-giant Shizhuyuan polymetallic deposit and its host granite, Southeast China. *Geol. Mag.* **2004**, *141*, 225–231.
